# Supplementary material for: Seasonal variation and etiologic inferences of childhood pneumonia and diarrhea mortality in India
Source: eLife. 2019 Aug 27;8:e46202. doi: 10.7554/eLife.46202 (PMC6759316; doi:10.7554/eLife.46202)
Supplement: Figure 1—source data 1. — 1We adjusted death data to reflect 2015 data from the United Nations Population Division and Inter-agency Group for Child Mortality Estimation. 2We used a three-year moving average of the weighted proportion of deaths to calculate mortality rates. Mortality rates were per 1000 lives births at ages 1–11 months and 1–4 years and per 100,000 population for children at aged 5–14 years. 3We calculated rate reductions using the formula ARR = log(U5MRt2/U5MRt1) / (t1 – t2) as described by You et al. (2015). 4Poorer states include the Empowerment Action Group-Assam states of Assam, Bihar, Chhattisgarh, Jharkhand, Madhya Pradesh, Odisha (Orissa before 2011), Rajasthan, Uttarakhand, and Uttar Pradesh. Richer states include all other states and union territories. [file elife-46202-fig1-data1.xlsx]

## Sheet: Sheet1
Population1			Mortality Rate2		2005-2013 Rate Reduction3	Deaths in 2013
			2005	2013		(000s)
1–11 Months (per 1,000 live births)
	Pneumonia		5.44	3.32	-39	86.14
		Boy	4.89	2.57	-47.4	35.09
		Girl	6.03	4.18	-30.6	51.53
		Poorer States4	6.84	4.13	-39.6	63
		Richer States4	3.67	2.34	-36.2	25.14
		Rural	6	3.35	-44.2	64.92
		Urban	3.56	3.22	-9.4	21.21
	Diarrhea		2.96	1.79	-39.4	46.58
		Boy	2.5	1.45	-42	19.8
		Girl	3.49	2.15	-38.4	26.46
		Poorer States4	3.68	2.57	-30.2	39.13
		Richer States4	2.05	1.04	-49.3	11.17
		Rural	3.19	1.83	-42.6	35.46
		Urban	2.21	1.66	-25	10.92
1–4 Years (per 1,000 live births)
	Pneumonia		3.39	2	-40.9	52.04
		Boy	2.77	1.87	-32.8	25.46
		Girl	4.09	2.11	-48.5	25.96
		Poorer States4	4.74	2.8	-40.9	42.63
		Richer States4	1.79	1.05	-41.3	11.25
		Rural	4	2.35	-41.4	45.48
		Urban	1.44	1.02	-28.9	6.73
	Diarrhea		3.47	1.76	-49.4	45.64
		Boy	2.66	1.5	-43.6	20.46
		Girl	4.41	2.05	-53.4	25.3
		Poorer States4	5.07	2.72	-46.3	41.47
		Richer States4	1.61	0.74	-53.9	7.99
		Rural	4.05	1.97	-51.3	38.29
		Urban	1.57	1.08	-31	7.13
5–14 Years (per 100,000 population)
	Pneumonia		7.6	4.6	-33.7	11.64
		Boy	6	4.1	-23.5	5.54
		Girl	9.5	5.1	-41	6.14
		Poorer States4	11.2	6.4	-35.1	9.21
		Richer States4	4.1	2.7	-30.3	2.93
		Rural	8.8	4.7	-40.6	8.81
		Urban	4	4.2	10.6	2.79
	Diarrhea		14	7.2	-43.5	18.29
		Boy	11.3	6.2	-39.4	8.29
		Girl	17.2	8.4	-46.2	10.12
		Poorer States4	20.7	10.8	-41.1	15.47
		Richer States4	7.4	3.7	-46.5	4.12
		Rural	15.8	8.8	-38	16.47
		Urban	8.7	2.8	-66.4	1.87
