# Supplementary material for: Seasonal variation and etiologic inferences of childhood pneumonia and diarrhea mortality in India
Source: eLife journal article supplement (doi:10.7554/elife.46202), 2019-08-27

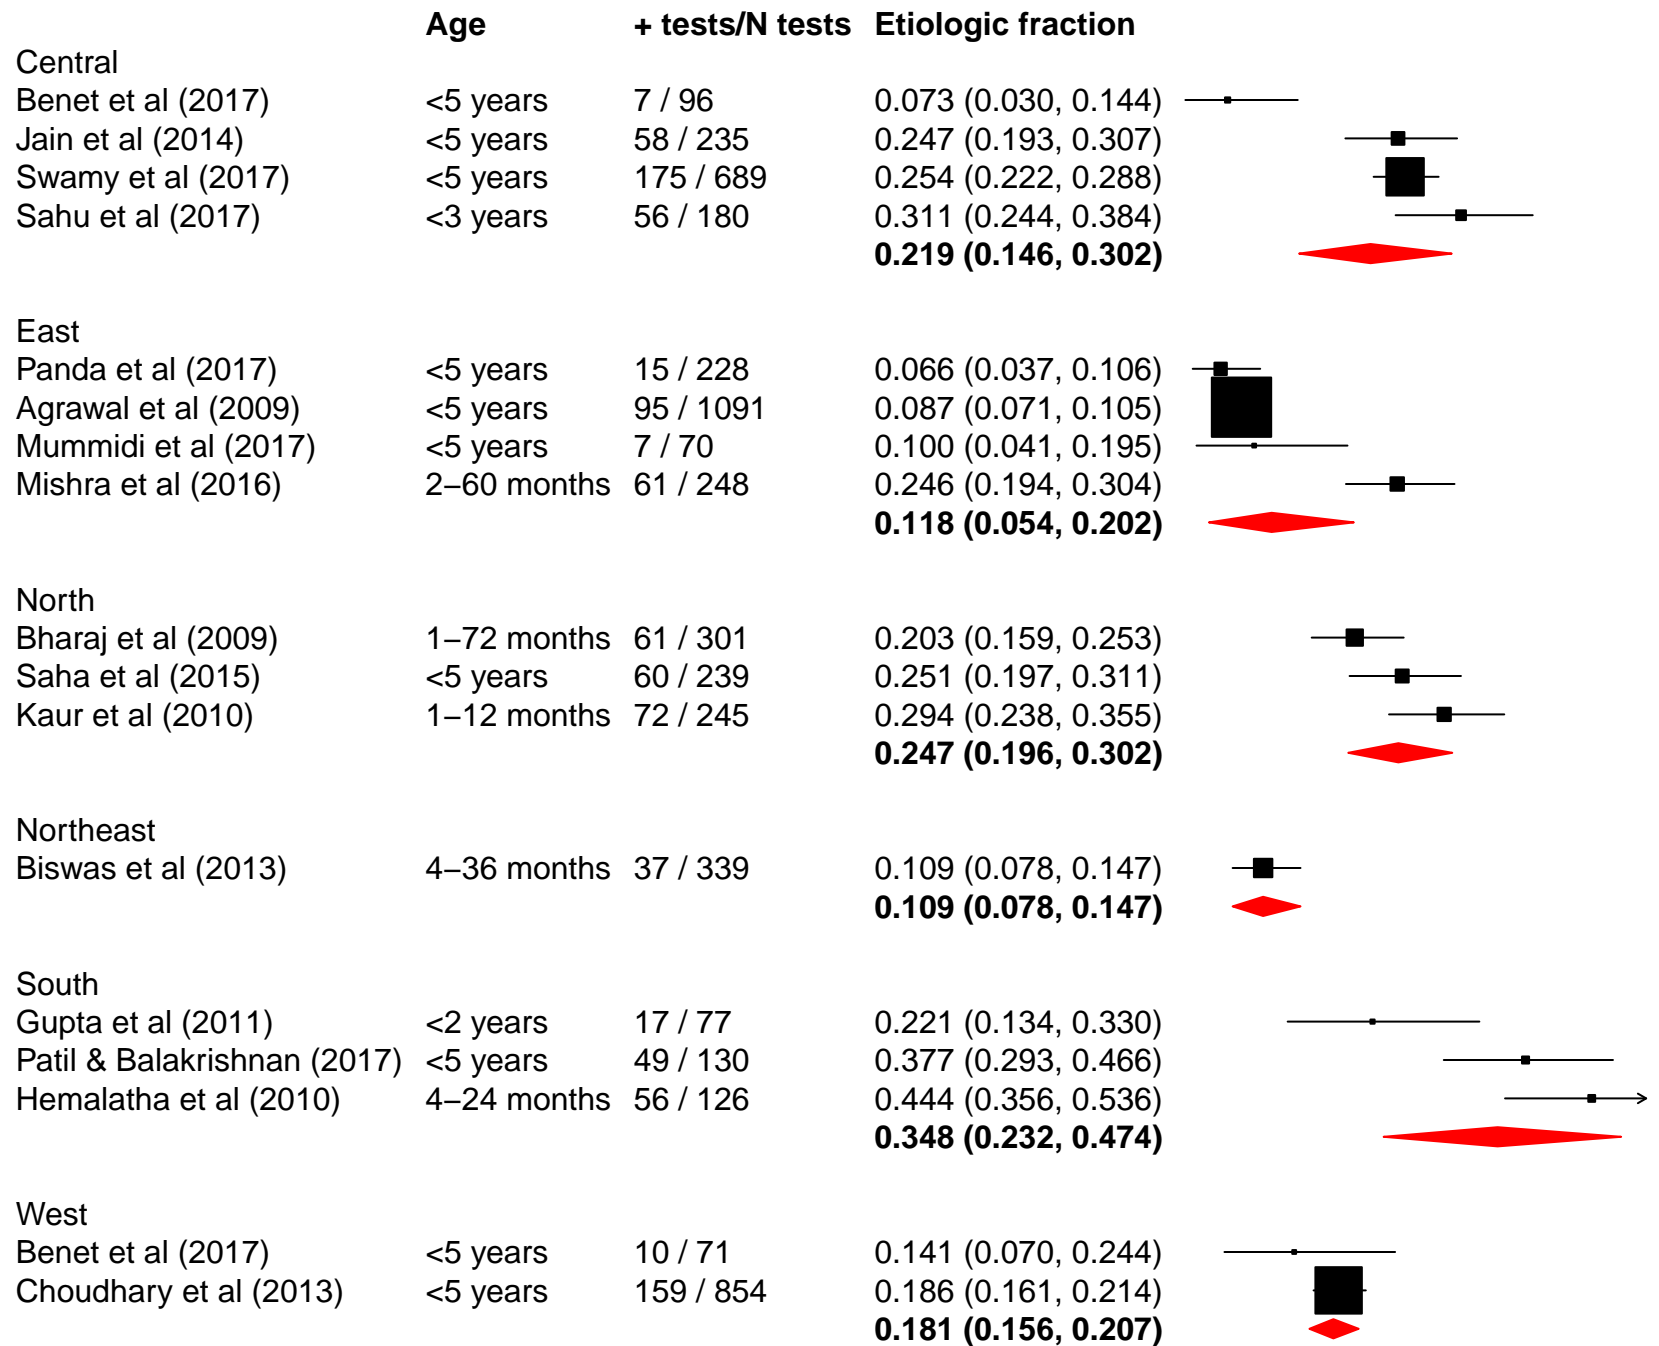

**Total studies = 16**

**Total tests = 5219**

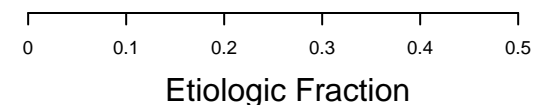

Supplement: supp [file elife_poa_e46202_Table_4_source_data_1.pdf › elife_poa_e46202_Table_4_source_data_1.pdf]
