# Supplementary material for: Seasonal variation and etiologic inferences of childhood pneumonia and diarrhea mortality in India
Source: eLife journal article supplement (doi:10.7554/elife.46202), 2019-08-27

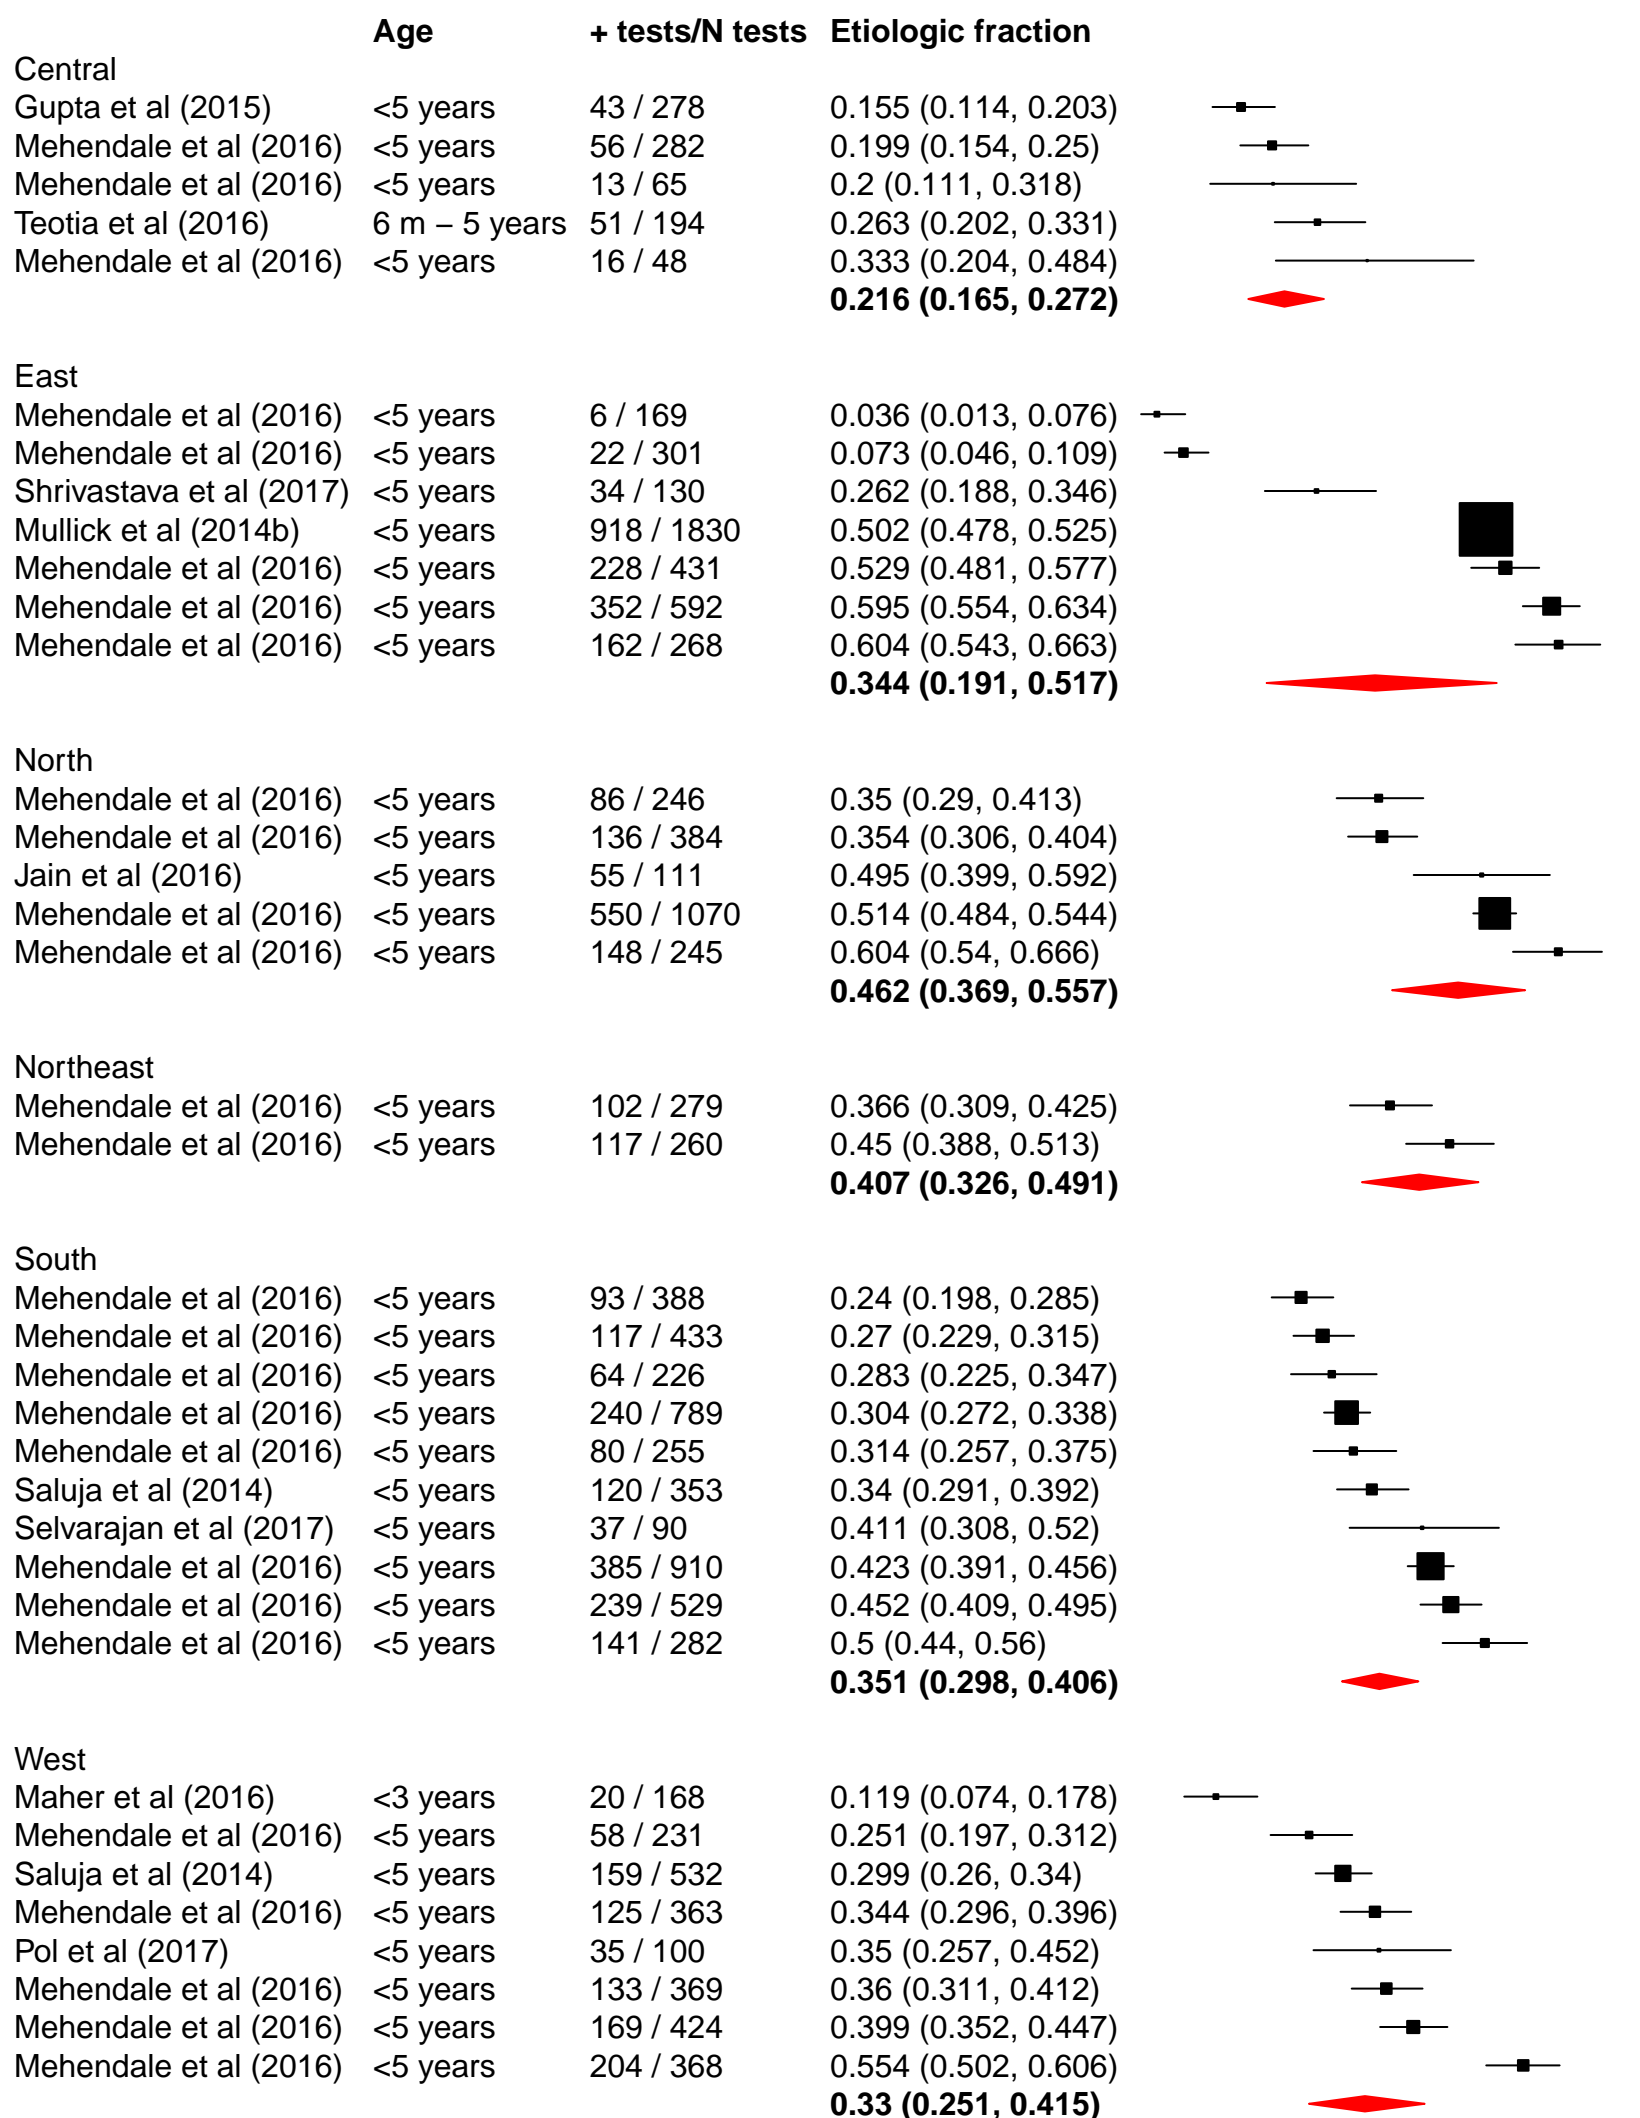

Total studies = 10

Total tests = 13993

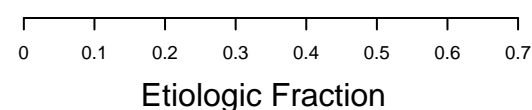

Supplement: supp [file elife_poa_e46202_Table_4_source_data_3.pdf › elife_poa_e46202_Table_4_source_data_3.pdf]
